# Supplementary material for: Magnetic copper hexacyanoferrate core–shell nanoparticles for effective cesium removal from aqueous solutions
Source: Royal Society of Chemistry journal article supplement (doi:10.1039/d2ew00712f), 2023-01-01
Supplement: d2ew00712f1.pdf [file d2ew00712f1.pdf]

**Supplementary Information for**

**Magnetic Copper Hexacyanoferrate Core-shell Nanoparticles  
for Effective Cesium Removal from Aqueous Solution**

Yihui Wang<sup>1</sup>, Fenghua Li<sup>2\*</sup>, Jiali Mao<sup>1</sup>, Xiaomin Wang<sup>3</sup>, Yong Shao<sup>2</sup> and Junhua

Yuan<sup>1\*,4</sup>

<sup>1</sup> Key Laboratory of the Ministry of Education for Advanced Catalysis Materials,  
College of Life Sciences and Chemistry, Zhejiang Normal University, Jinhua,  
Zhejiang, 321004 (China)

<sup>2</sup> State Key Laboratory of Electroanalytical Chemistry, Changchun Institute of Applied  
Chemistry, the Chinese Academy of Sciences, Changchun, Jilin, 130022 (China).

<sup>3</sup> Library of Zhejiang Normal University, Zhejiang Normal University, Jinhua,  
Zhejiang, 321004 (China)

<sup>4</sup> School of Pharmacy, Hubei University of Science and Technology, Xianning, Hubei,  
437100 (China)

**Figure S1**

---

\*Corresponding author: Tel.& Fax: +86 579 82282269, E-mail address: jhyuan@zjnu.cn. (Junhua Yuan);  
fhli@ciac.ac.n (Fenghua Li).

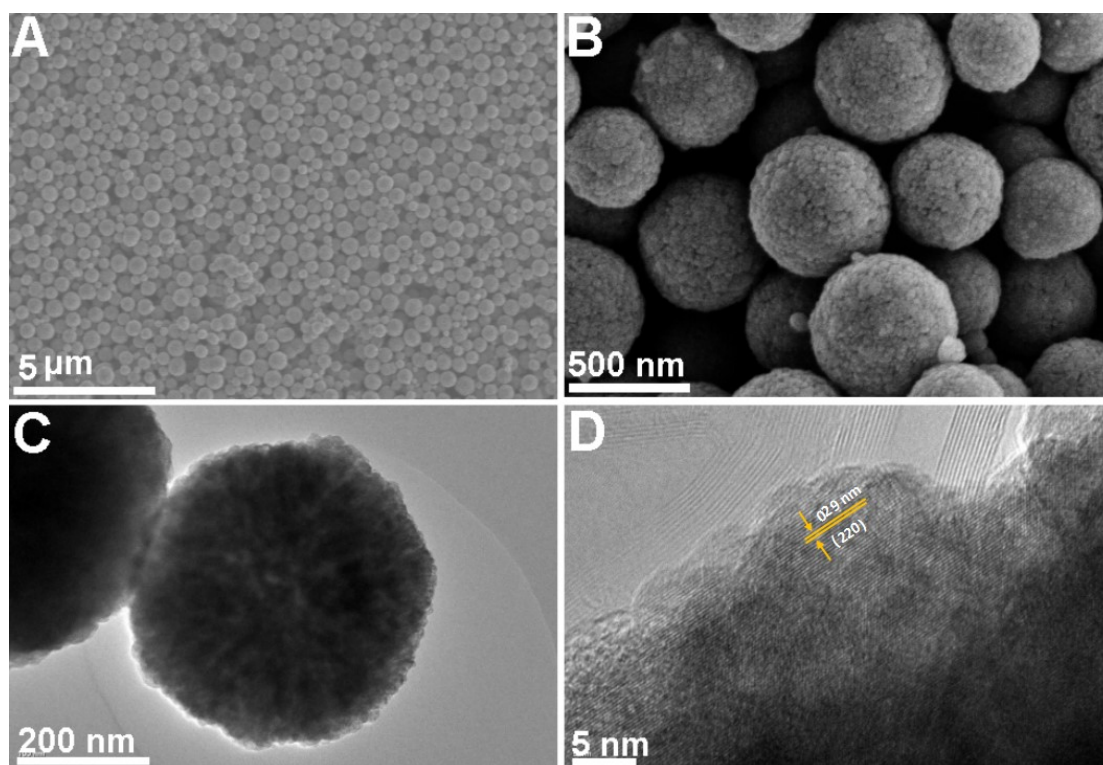

**Figure S1** SEM images of Fe<sub>3</sub>O<sub>4</sub> NPs under different magnification: (A) 5 μm and (B) 500 nm. TEM images of Fe<sub>3</sub>O<sub>4</sub> NPs under different magnification: (C) 200 nm and (D) 5 nm.

**Figure S2**

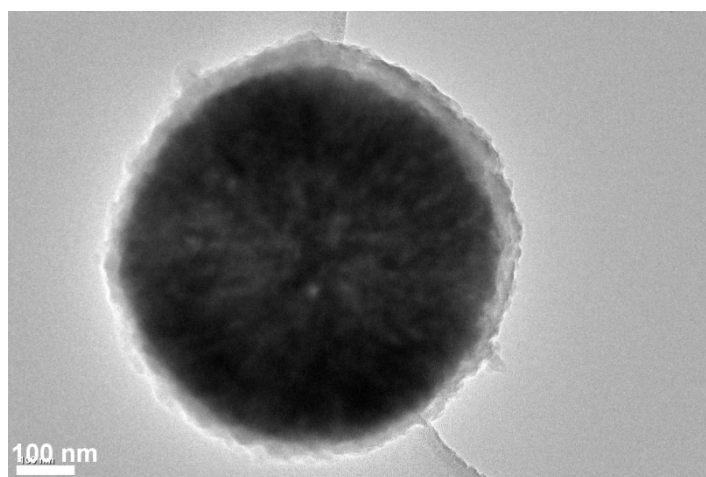

**Figure S2** TEM images of PDDA @Fe<sub>3</sub>O<sub>4</sub> nanoparticles.

**Table S1** Comparison on the maximum adsorption capacity ( $Q_{\max}$ ) and distribution coefficient ( $K_d$ ) of CuHCF@Fe<sub>3</sub>O<sub>4</sub> nanocomposites with recently reported literature.

| Materials                  | Performance<br>$Q_{\max}$<br>mg·g <sup>-1</sup> | $K_d$<br>L·g <sup>-1</sup> | T<br>K | pH   | Ref |
|----------------------------|-------------------------------------------------|----------------------------|--------|------|-----|
| PBMX-III <sub>sphere</sub> | 315.9                                           | 10.3                       | 298    | 5-10 | [1] |
| PB-CMCNF                   | 130                                             | 3.06                       | 298    | 7    | [2] |
| PBA/PVC                    | 152.8                                           | 1.04                       | 298    | 6    | [3] |
| EA-CuHCF                   | 452.5                                           | 23.4                       | 298    | 7    | [4] |

|                                                  |       |       |     |   |            |
|--------------------------------------------------|-------|-------|-----|---|------------|
| HCF-SA                                           | 114   | 100   | 298 | 8 | [5]        |
| PB@PAAM                                          | 374   | 3.6   | 298 | 7 | [6]        |
| KCuHCFs                                          | 74.7  | 27.1  | 298 | 4 | [7]        |
| Nano-PBA <sub>Cu</sub>                           | 95.8  | 6.5   | 298 | 5 | [8]        |
| PAAc/Lap-HCF                                     | 146.2 | 130   | 298 | 7 | [9]        |
| PB@PD                                            | 54.34 | 57    | 298 | 6 | [10]       |
| Fe <sub>3</sub> O <sub>4</sub> -CTS-NaCuHCFe NPs | 161.3 | 446.7 | 318 | 5 | [11]       |
| KCuFC-HMSS                                       | 13.1  | 53.1  | 308 | 6 | [12]       |
| CuHCF/poly-urushiol                              | 214   | 1000  | 298 | 7 | [13]       |
| 3D rGO/PBA <sub>s</sub>                          | 204.9 | 58    | 298 | 5 | [14]       |
| KNiHCF-loaded PAN                                | 59.2  | 156   | 298 | 9 | [15]       |
| ZnHCF-ZDC                                        | 204.9 | 104   | 298 | 7 | [16]       |
| D-Mt-Mag-HCF                                     | 159.2 | 82    | 298 | 8 | [17]       |
| CuHCF@Fe <sub>3</sub> O <sub>4</sub> NPs         | 268   | 250   | 298 | 7 | This study |

## Reference

- [1] A. Shahzad, M. Moztahida, K. Tahir, B. Kim, H. Jeon, A. A. Ghani, N. Maile, J. S. Jang, D. S. Lee, Highly effective prussian blue-coated MXene aerogel spheres for selective removal of cesium ions, *J. Nucl. Mater.*, 2020, 539, 152277-152286.
- [2] S. Eun, H. -J. Hong, H. Kim, H. S. Jeong, S. Kim, J. Jung, J. Ryu, Prussian blue-embedded carboxymethyl cellulose nanofibril membranes for removing radioactive cesium from aqueous solution, *Carbohydr. Poly.*, 2020, 235, 115984-115991.
- [3] S. Q. Chen, J. Y. Hu, Y. F. Guo, N. Belzile, T. L. Deng, Enhanced kinetics and super selectivity toward Cs<sup>+</sup> in multicomponent aqueous solutions: A robust Prussian

blue analogue/polyvinyl chloride composite membrane, *Environ. Res.*, 2020, 189, 109952-109960.

[4] C. Ma, Z. Jiang, S. Han, Y. Guo, T. Deng, Novel one-pot solvothermal synthesis of high-performance copper hexacyanoferrate for Cs<sup>+</sup> removal from wastewater, *J. Chem.*, 2021, 2021, 3762917-3762925.

[5] Y. H. Kim, H. H. Eom, D. H. Kim, D. Harbottle, J. W. Lee, Adsorptive removal of cesium by electrospun nanofibers embedded with potassium copper hexacyanoferrate, *Sep. Purif. Technol.*, 2021, 255, 117745-117752.

[6] Y. Jung, U. S. Choi, Y. G. Ko, Securely anchored Prussian blue nanocrystals on the surface of porous PAAm sphere for high and selective cesium removal, *J. Hazard. Mater.*, 2021, 420, 126654-126663.

[7] A.M. Soliman, H.A. Madbouly, E.S. El Sheikh, M. Khalil, A. Massad, Selective removal and immobilization of cesium from aqueous solution using sludge functionalized with potassium copper hexacyanoferrate: a low-cost adsorbent, *J. Radioanal. Nucl. Chem.*, 2021, 330, 207-223.

[8] W. X. Han, Y. Huang, M. H. Su, H. Y. Liu, C. J. Shen, Y. Zhou, T. Ou, D. Y. Chen, Highly selective adsorption and lattice process of cesium by cubic cyanide-based functional materials, *Environ. Res.*, 2022, 214, 114085-114094

[9] B. Gao, H. -R. Yu, H. -Y. Zhang, T. Liang, C. -J. Cheng, High-density immobilization of potassium copper hexacyanoferrate in poly(acrylic acid)/laponite hydrogel for enhanced Cs<sup>+</sup> removal, *J. Environ. Chem. Eng.*, 2022, 10, 107979-107989.

[10] S. Yoon, M. Choi, Y. Hwang, S. J. Bae, Upcycling of steel slag for manufacture

of Prussian-blue-encapsulated pectin beads and its use for efficient removal of aqueous cesium, *J. Clean. Prod.*, 2021, 319, 128786-12878

[11] T. T. Xia, L. L. Yin, Y. H. Xie, Y. Q. Ji, Efficiently remove of Cs(I) by metals hexacyanoferrate modified magnetic Fe<sub>3</sub>O<sub>4</sub>-chitosan nanoparticles, *Chem. Phys. Lett.*, 2020, 746, 137293-137300.

[12] X. Y. Peng, J. H. Zheng, J. S. Wang, C. Xiang, R. Wang, Synthesis of hollow mesoporous silica spheres functionalized with copper ferrocyanide and its application for Cs<sup>+</sup> removal, *Environ. Sci. Pollut. Res.*, 2022, 29, 53509-53521.

[13] H. Shen, L.D. Zhu, Q. Lin, S. J. Guo, H. G. Zhang, Urushiol-resourced dopamine analogue as a trigger to construct clay-hexacyanoferrate hydrogel for cesium removal, *J. Environ. Chem. Eng.*, 2021, 9, 106140-106151.

[14] J. B. Huo, G. C. Yu, J. L. Wang, Selective adsorption of cesium (I) from water by Prussian blue analogues anchored on 3D reduced graphene oxide aerogel, *Sci. Total Environ.*, 2021, 761, 143286.

[15] Y. Bondar, Y. Olkhovyk, S. Kuzenko, Nanocomposite adsorbent based on polyacrylonitrile fibers for rapid and selective removal of Cs radionuclides, *J. Radioanal. Nucl. Chem.*, 2021, 330, 1221-1231.

[16] H. J. Kim, H. H. Eom, Y. H. Kim, D. Harbottle, J. W. Lee, Reversible electro-mediated cesium ion removal using a zeolitic imidazolate framework derived zinc hexacyanoferrate composite, *Chem. Eng. J.*, 2022, 450, 138029-138039.

[17] L. D. Zhu, D. Q. Zhu, Y. Sheng, J. J. Xu, D. Harbottle, H. G. Zhang, Polydopamine-coated magnetic montmorillonite immobilized with potassium copper

hexacyanoferrate for selective removal of  $\text{Cs}^+$  and its facile recovery, *Appl. Clay Sci.*,  
2022, 216, 106367-106377.
